# Supplementary material
Source: MDPI journal article supplement (https://www.mdpi.com/2072-6643/14/3/691)
Supplement: s1 [file s1]

Archive with 1 entries (1 files):
- Supplementary material-new.pdf
